# Supplementary material for: Effects of Long-Term Repeated Freeze-Thaw Cycles on the Engineering Properties of Compound Solidified/Stabilized Pb-Contaminated Soil: Deterioration Characteristics and Mechanisms
Source: MDPI journal article supplement (doi:10.3390/ijerph17051798), 2020-03-10
Supplement: s1 [file s1]

**Table.S1** Result of nonparametric tests for the UCS of Pb-CSCSs

| Binder ratios | Null hypothesis                                                                                          | Test                                                 | Significance | Decisions                  |
|---------------|----------------------------------------------------------------------------------------------------------|------------------------------------------------------|--------------|----------------------------|
| C2.5S5F5      | The distributions of the $q_u$ of Pb-CSCSs with $Pb^{2+}$ concentration 0.05%, 0.5% and 1% are the same. | Related-Samples Kendall's Coefficient of Concordance | 0.115        | Retain the null hypothesis |
| C5S2.5F2.5    |                                                                                                          |                                                      | 0.030        | Reject the null hypothesis |
| C5S5          |                                                                                                          |                                                      | 0.223        | Retain the null hypothesis |

Note: the significance level is 0.05.

**Table.S2** Pairwise comparison of the UCS of the C5S2.5F2.5 solidified Pb-contaminated soil

| Sample1-Sample2 | Test statistics | Standard error | Standard test statistics | Significance | Adjusted significance |
|-----------------|-----------------|----------------|--------------------------|--------------|-----------------------|
| 0.05%-0.5%      | -0.500          | 0.577          | -0.866                   | 0.386        | 1.000                 |
| 0.05%-1%        | 1.500           | 0.577          | 2.598                    | 0.009        | 0.028                 |
| 0.5%-1%         | 1.000           | 0.577          | 1.732                    | 0.083        | 0.250                 |

Note: the significance level is 0.05.

**Table.S3** Result of a nonparametric hypothesis test for the  $E_{50}$  of Pb-CSCSs

| Binder ratios | Null hypothesis                                                                                             | Test                                                 | Significance | Decisions                  |
|---------------|-------------------------------------------------------------------------------------------------------------|------------------------------------------------------|--------------|----------------------------|
| C2.5S5F5      | The distributions of the $E_{50}$ of Pb-CSCSs with $Pb^{2+}$ concentration 0.05%, 0.5% and 1% are the same. | Related-Samples Kendall's Coefficient of Concordance | 0.607        | Retain the null hypothesis |
| C5S2.5F2.5    |                                                                                                             |                                                      | 0.607        | Retain the null hypothesis |
| C5S5          |                                                                                                             |                                                      | 0.002        | Reject the null hypothesis |

Note: the significance level is 0.05.

**Table.S4** Pairwise comparison of the  $E_{50}$  of the C5S5 solidified Pb-contaminated soil

| Sample1-Sample2 | Test statistics | Standard error | Standard test statistics | Significance | Adjusted significance |
|-----------------|-----------------|----------------|--------------------------|--------------|-----------------------|
| 0.05%-0.5%      | 1.000           | 0.577          | 1.732                    | 0.083        | 0.250                 |
| 0.05%-1%        | 2.000           | 0.577          | 3.464                    | 0.001        | 0.002                 |
| 0.5%-1%         | 1.000           | 0.577          | 1.732                    | 0.083        | 0.250                 |

Note: the significance level is 0.05.

**Table.S5** Result of nonparametric hypothesis tests for the  $\varphi$  of Pb-CSCSs

| Binder ratios | Null hypothesis                                                                                              | Test                                                 | Significance | Decisions                  |
|---------------|--------------------------------------------------------------------------------------------------------------|------------------------------------------------------|--------------|----------------------------|
| C2.5S5F5      | The distributions of the $\varphi$ of Pb-CSCSs with $Pb^{2+}$ concentration 0.05%, 0.5% and 1% are the same. | Related-Samples Kendall's Coefficient of Concordance | 0.016        | Reject the null hypothesis |
| C5S2.5F2.5    |                                                                                                              |                                                      | 0.115        | Retain the null hypothesis |
| C5S5          |                                                                                                              |                                                      | 0.115        | Retain the null hypothesis |

Note: the significance level is 0.05.

**Table.S6** Pairwise comparison of the  $\varphi$  of the C2.5S5F5 solidified Pb-contaminated soil

| Sample1-Sample2 | Test statistics | Standard error | Standard test statistics | Significance | Adjusted significance |
|-----------------|-----------------|----------------|--------------------------|--------------|-----------------------|
| 0.05%-0.5%      | 0.833           | 0.577          | 1.443                    | 0.149        | 0.447                 |
| 0.05%-1%        | 1.667           | 0.577          | 2.887                    | 0.004        | 0.012                 |
| 0.5%-1%         | 0.833           | 0.577          | 1.443                    | 0.149        | 0.447                 |

Note: the significance level is 0.05.

**Table.S7** Result of nonparametric hypothesis tests for the *c* of Pb-CSCSs

| Binder ratios | Null hypothesis                                                                                                    | Test                                                 | Significance | Decisions                  |
|---------------|--------------------------------------------------------------------------------------------------------------------|------------------------------------------------------|--------------|----------------------------|
| C2.5S5F5      | The distributions of the <i>c</i> of Pb-CSCSs with Pb <sup>2+</sup> concentration 0.05%, 0.5% and 1% are the same. | Related-Samples Kendall's Coefficient of Concordance | 0.011        | Reject the null hypothesis |
| C5S2.5F2.5    |                                                                                                                    |                                                      | 0.311        | Retain the null hypothesis |
| C5S5          |                                                                                                                    |                                                      | 0.136        | Retain the null hypothesis |

Note: the significance level is 0.05.

**Table.S8** Pairwise comparison of *c* of the C2.5S5F5 solidified Pb-contaminated soil

| Sample1-Sample2 | Test statistics | Standard error | Standard test statistics | Significance | Adjusted significance |
|-----------------|-----------------|----------------|--------------------------|--------------|-----------------------|
| 0.05%-0.5%      | 0.000           | 0.577          | 0.000                    | 1.000        | 1.000                 |
| 0.05%-1%        | -1.500          | 0.577          | -2.598                   | 0.009        | 0.028                 |
| 0.5%-1%         | -1.500          | 0.577          | -2.598                   | 0.009        | 0.028                 |

Note: the significance level is 0.05.

**Table.S9** Result of nonparametric hypothesis tests for the *k* of Pb-CSCSs

| Binders ratios | Null hypothesis                                                                                                    | Test                                                 | Significance | Decisions                  |
|----------------|--------------------------------------------------------------------------------------------------------------------|------------------------------------------------------|--------------|----------------------------|
| C2.5S5F5       | The distributions of the <i>k</i> of Pb-CSCSs with Pb <sup>2+</sup> concentration 0.05%, 0.5% and 1% are the same. | Related-Samples Kendall's Coefficient of Concordance | 0.002        | Reject the null hypothesis |
| C5S2.5F2.5     |                                                                                                                    |                                                      | 0.607        | Retain the null hypothesis |
| C5S5           |                                                                                                                    |                                                      | 0.009        | Reject the null hypothesis |

Note: the significance level is 0.05.

**Table.S10** Pairwise comparison of *k* of the C2.5S5F5 (C5S5) solidified Pb-contaminated soil

| Sample1-Sample2 | Test statistics | Standard error | Standard test statistics | Significance  | Adjusted significance |
|-----------------|-----------------|----------------|--------------------------|---------------|-----------------------|
| 0.05%-0.5%      | 1.000 (0.333)   | 0.577 (0.577)  | 1.732 (0.577)            | 0.083 (0.564) | 0.250 (1.000)         |
| 0.05%-1%        | 2.000 (1.667)   | 0.577 (0.577)  | 3.464 (2.887)            | 0.001 (0.004) | 0.002 (0.012)         |
| 0.5%-1%         | 1.000 (1.333)   | 0.577 (0.577)  | 1.732 (2.309)            | 0.083 (0.021) | 0.250 (0.063)         |

Note: the significance level is 0.05.

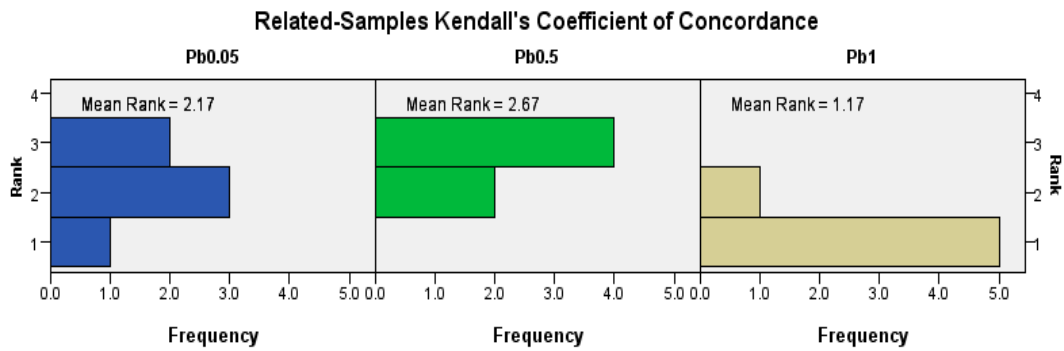

Fig.S1 The panel histogram of Kendall synergistic coefficient for related samples of the UCS of the C5S2.5F2.5 solidified Pb-contaminated soil

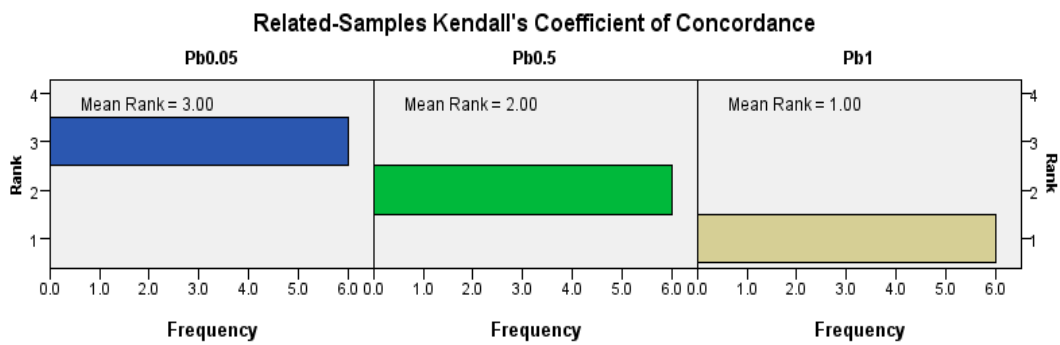

Fig.S2 Panel histogram of Kendall synergistic coefficient for related samples of the E50 of the C5S5 solidified Pb-contaminated soil

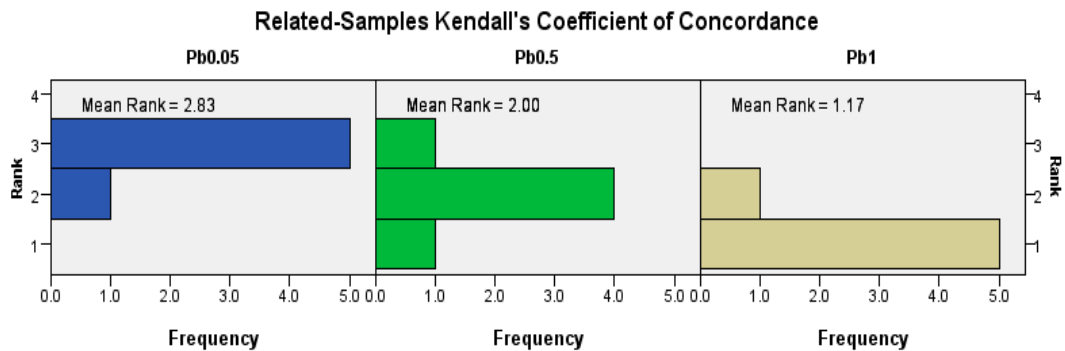

Fig.S3 Panel histogram of Kendall synergistic coefficient for related samples of the  $\phi$  of the C2.55S5F5 solidified Pb-contaminated soil

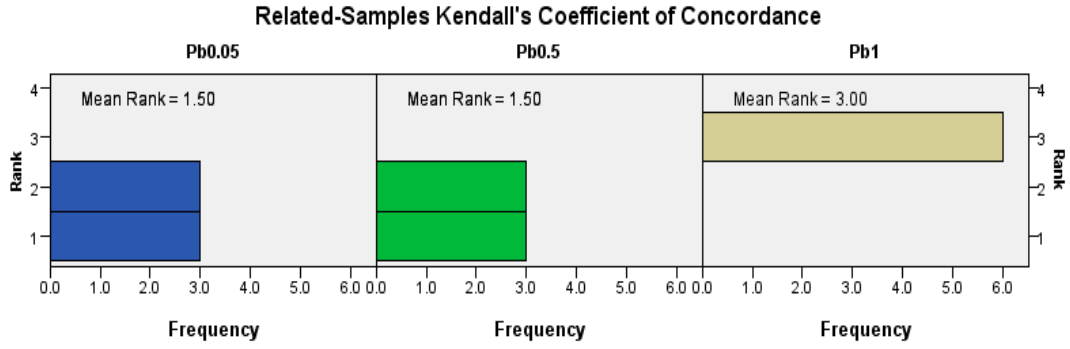

**Fig.S4** Panel histogram of Kendall synergistic coefficient for related samples of the *c* of the C2.5S5F5 solidified Pb-contaminated soil

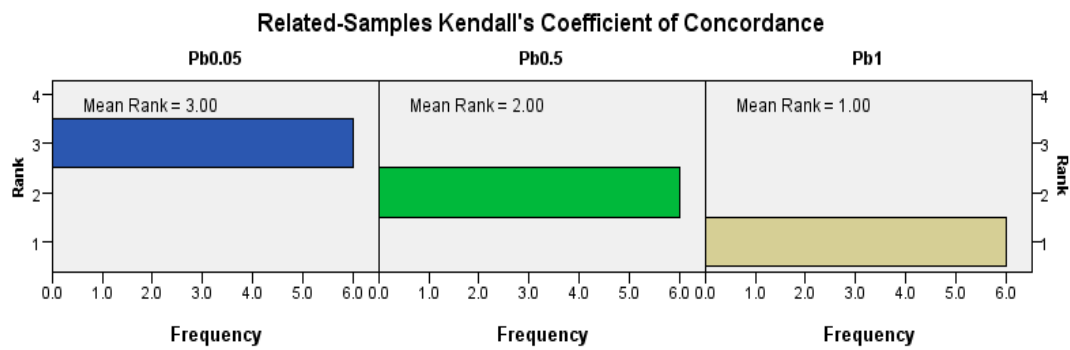

(a)C2.5S5F5

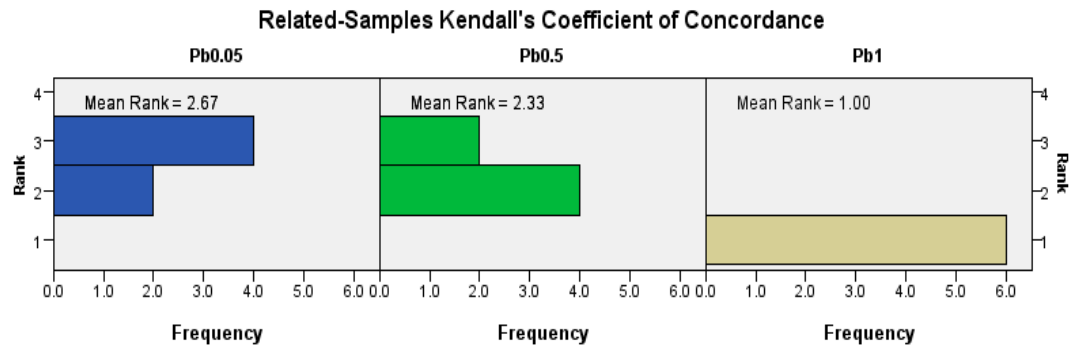

(b)C5S5

**Fig.S5** Panel histogram of Kendall synergistic coefficient for related samples of *k* of the C2.5S5F5 and the C5S5 solidified Pb-contaminated soil
